# Supplementary material
Source: PubMed Central journal article supplement (PMC4652932)
Supplement: NIHMS649647-supplement-2.pdf [file NIHMS649647-supplement-2.pdf]

## **SUPPLEMENTAL MATERIAL**

**Supplemental Table 1.** Baseline sample characteristics, by country

| <b>Characteristics</b>                                     | <b>US<br/>(N=2985)</b>           | <b>Spain<br/>(N=516)</b>         | <b>Australia<br/>(N=71)</b>      |
|------------------------------------------------------------|----------------------------------|----------------------------------|----------------------------------|
| <b>Sociodemographic characteristics</b>                    |                                  |                                  |                                  |
| Age, median (IQR) (range)                                  | 48 (44 - 52)<br>(range: 18 - 55) | 47 (42 - 51)<br>(range: 20 - 55) | 48 (44 - 51)<br>(range: 32 - 55) |
| Age, %                                                     |                                  |                                  |                                  |
| 18-34 years                                                | 136 (4.6%)                       | 28 (5.4%)                        | 1 (1.4%)                         |
| 35-44 years                                                | 716 (24.0%)                      | 159 (30.8%)                      | 17 (23.9%)                       |
| 45-55 years                                                | 2133 (71.5%)                     | 329 (63.8%)                      | 53 (74.6%)                       |
| Race                                                       |                                  |                                  |                                  |
| White                                                      | 2259 (75.8%)                     | 483 (94.0%)                      | 58 (81.7%)                       |
| Black                                                      | 535 (17.9%)                      | 15 (2.9%)                        | 4 (5.6%)                         |
| Other                                                      | 187 (6.3%)                       | 16 (3.1%)                        | 9 (12.7%)                        |
| Education                                                  |                                  |                                  |                                  |
| Less than high school                                      | 58 (2.0%)                        | 127 (26.8%)                      | 0 (0.0%)                         |
| High school                                                | 1223 (41.3%)                     | 194 (40.9%)                      | 42 (60.0%)                       |
| More than high school                                      | 1679 (56.7%)                     | 153 (32.3%)                      | 28 (40.0%)                       |
| Marital status                                             |                                  |                                  |                                  |
| Married/living with a partner as if married                | 1661 (55.8%)                     | 368 ( 72.4% )                    | 40 (57.1%)                       |
| Not married                                                | 1318 (44.2%)                     | 140 ( 27.6% )                    | 30 (42.9%)                       |
| <b>Baseline health status</b>                              |                                  |                                  |                                  |
| Diabetes mellitus                                          | 1062 (35.6%)                     | 157 (30.4%)                      | 27 (38.0%)                       |
| Hypertension                                               | 1980 (66.3%)                     | 237 (45.9%)                      | 43 (60.6%)                       |
| Hypercholesterolemia                                       | 2588 (86.7%)                     | 414 (80.2%)                      | 60 (84.5%)                       |
| Chronic lung disease                                       | 347 (11.6%)                      | 12 (2.3%)                        | 4 (5.6%)                         |
| Chronic renal dysfunction                                  | 339 (11.4%)                      | 23 (4.5%)                        | 5 (7.0%)                         |
| Depression                                                 | 964 (33.6%)                      | 150 (30.5%)                      | 17 (25.0%)                       |
| History of cancer                                          | 105 (3.5%)                       | 13 (2.5%)                        | 1 (1.4%)                         |
| History of cardiovascular condition                        |                                  |                                  |                                  |
| Prior acute myocardial infarction (AMI)                    | 512 (17.2%)                      | 31 (6.0%)                        | 10 (14.1%)                       |
| Prior coronary artery bypass graft                         | 116 (3.9%)                       | 2 (0.4%)                         | 2 (2.8%)                         |
| Prior percutaneous coronary intervention                   | 489 (16.4%)                      | 19 (3.7%)                        | 8 (11.3%)                        |
| Prior peripheral artery disease                            | 74 (2.5%)                        | 5 (1.0%)                         | 1 (1.4%)                         |
| Prior angina pectoris                                      | 805 (27.0%)                      | 141 (27.4%)                      | 20 (28.2%)                       |
| History of congestive heart failure                        | 140 (4.7%)                       | 1 (0.2%)                         | 0 (0.0%)                         |
| Prior stroke                                               | 141 (4.7%)                       | 6 (1.2%)                         | 0 (0.0%)                         |
| Prior valve surgery                                        | 22 (0.7%)                        | 1 (0.2%)                         | 0 (0.0%)                         |
| SF-12 physical component summary (PCS) score, median (IQR) | 44.8 (33.9 - 53.2)               | 52.3 (43.1 - 56.4)               | 43.2 (34.5 - 53.5)               |
| SF-12 mental component summary (MCS)                       | 47.2 (36.6 - 55.3)               | 45.4 (35.3 - 56.3)               | 51.1 (41.0 - 57.3)               |

|                                               |                    |                    |                    |
|-----------------------------------------------|--------------------|--------------------|--------------------|
| score, median (IQR)                           |                    |                    |                    |
| History of smoke                              |                    |                    |                    |
| Never smoked                                  | 748 (25.1%)        | 60 (11.7%)         | 10 (14.1%)         |
| Current smoker                                | 1626 (54.6%)       | 362 (70.3%)        | 46 (64.8%)         |
| Past smoker (>1month and <1year)              | 127 (4.3%)         | 31 (6.0%)          | 5 (7.0%)           |
| Past smoker (>1year)                          | 478 (16.0%)        | 62 (12.0%)         | 10 (14.1%)         |
| Body mass index, median (IQR)                 | 30.4 (26.4 - 35.7) | 26.8 (24.0 - 30.0) | 30.6 (26.6 - 34.6) |
| AMI presentation                              |                    |                    |                    |
| STEMI                                         | 1485 (49.7%)       | 326 (63.2%)        | 49 (69.0%)         |
| Cardiogenic shock upon hospital admission     | 13 (0.5%)          | 8 (1.6%)           | 0 (0.0%)           |
| Peak troponin during index hospital stay      | 6.9 (1.5 - 27.3)   | 10.0 (2.5 - 40.0)  | 0.4 (0.2 - 1.3)    |
| Ejection fraction <40%                        | 322 (11.1%)        | 46 (9.1%)          | 2 (3.9%)           |
| GRACE risk score >99                          | 284 (9.7%)         | 12 (2.4%)          | 3 (4.8%)           |
| Hemodynamic instability                       | 231 (7.7%)         | 74 (14.3%)         | 4 (5.6%)           |
| Length of hospital stay, median (range)       | 3 (0 - 61)         | 6 (0 - 61)         | 3 (2 - 28)         |
| First heart rate measured, median (IQR)       | 82 (70 - 95)       | 78 (65 - 90)       | 80 (69 - 96)       |
| First systolic blood pressure, median (IQR)   | 143 (125-162)      | 133 (114-155)      | 140 (120-160)      |
| Present more than 6 hours after symptom onset | 1323 (44.5%)       | 143 (27.8%)        | 29 (40.8%)         |
| Low social support                            | 411 (14.1%)        | 64 (12.8%)         | 9 (12.9%)          |

---

Statistics are reported as n (%) unless otherwise specified. GRACE = Global Registry of Acute Coronary Events; IQR = Interquartile Range; STEMI = ST-elevation myocardial infarction.

**Supplemental Table 2.** Sex differences in baseline perceived stress and one-month recovery, by country

|                                                   | US<br>(N=2985) |             | Spain<br>(N=516) |              | Australia<br>(N=71) |             |
|---------------------------------------------------|----------------|-------------|------------------|--------------|---------------------|-------------|
|                                                   | Men            | Women       | Men              | Women        | Men                 | Women       |
| Baseline perceived stress scale (PSS-14) score    | 23.6 (9.1)     | 27.1 (9.9)  | 22.0 (8.3)       | 26.4 (9.7)   | 24.0 (9.2)          | 24.3 (10.4) |
| One-month recovery                                |                |             |                  |              |                     |             |
| Improvement in angina frequency                   | 4.9 (22.6)     | 5.7 (25.0)  | 3.9 (17.4)       | 0.7 (24.6)   | 3.5 (18.7)          | 0.3 (27.6)  |
| Improvement in angina-related physical limitation | 6.9 (23.2)     | 12.0 (28.9) | 0.1 (20.1)       | -5.9 (27.5)  | 2.6 (10.2)          | 3.9 (26.3)  |
| Improvement in angina-related quality of life     | 12.8 (27.8)    | 12.2 (29.4) | 10.4 (21.9)      | 2.4 (22.9)   | 16.3 (27.6)         | 6.3 (30.0)  |
| Improvement in SF-12 PCS score                    | -1.6 (11.9)    | -1.8 (11.5) | -2.4 (10.3)      | -5.5 (11.6)  | 3.6 (12.7)          | 0.1 (12.3)  |
| Improvement in SF-12 MCS score                    | 3.8 (11.7)     | 3.9 (12.7)  | 6.0 (12.3)       | 3.7 (14.1)   | 2.3 (11.5)          | -3.4 (10.5) |
| Improvement in EQ-5D utility index score          | 0.1 (0.2)      | 0.1 (0.2)   | 0.027 (0.2)      | -0.002 (0.2) | 0.1 (0.2)           | 0.1 (0.3)   |
| Improvement in EQ-5D visual analog scale          | 7.8 (21.1)     | 7.2 (23.4)  | 1.8 (21.4)       | -2.8 (23.7)  | 12.8 (21.6)         | 13.2 (26.2) |

Statistics are reported as mean (standard deviation). PCS = physical component summary; MCS = mental component summary; EQ-5D = Euro-Qol

**Supplemental Table 3.** Sex differences in perceived stress scale (PSS-14)

|                                                                                                                                        |              | <b>Total<br/>(N=3,572)</b> | <b>Male<br/>(N=1,175)</b> | <b>Female<br/>(N=2,397)</b> | <b>P-<br/>value</b> |
|----------------------------------------------------------------------------------------------------------------------------------------|--------------|----------------------------|---------------------------|-----------------------------|---------------------|
| PSS-14 score                                                                                                                           | Mean (SD)    | 25.8 (9.7)                 | 23.4 (9.0)                | 27.0 (9.9)                  | <.0001              |
| Score of positive items                                                                                                                | Mean (SD)    | 10.7 (5.1)                 | 9.9 (4.8)                 | 11.1 (5.2)                  | <.0001              |
| Score of negative items                                                                                                                | Mean (SD)    | 15.1 (6.0)                 | 13.5 (5.7)                | 15.9 (6.0)                  | <.0001              |
|                                                                                                                                        |              |                            | N ( % )                   | N ( % )                     |                     |
| 1. In the last month, how often have you been upset because of something that happened unexpectedly                                    | Never        | 368 (10.4%)                | 154 (13.3%)               | 214 (9.0%)                  |                     |
|                                                                                                                                        | Almost never | 581 (16.4%)                | 242 (20.8%)               | 339 (14.2%)                 |                     |
|                                                                                                                                        | Sometimes    | 1292 (36.5%)               | 455 (39.2%)               | 837 (35.2%)                 |                     |
|                                                                                                                                        | Fairly often | 736 (20.8%)                | 205 (17.6%)               | 531 (22.3%)                 |                     |
|                                                                                                                                        | Very often   | 564 (15.9%)                | 106 (9.1%)                | 458 (19.3%)                 |                     |
| 2. In the last month, how often have you felt that you were unable to control the important things in your life                        | Never        | 670 (19.0%)                | 279 (24.0%)               | 391 (16.5%)                 |                     |
|                                                                                                                                        | Almost never | 617 (17.5%)                | 259 (22.3%)               | 358 (15.1%)                 |                     |
|                                                                                                                                        | Sometimes    | 1103 (31.2%)               | 355 (30.6%)               | 748 (31.5%)                 |                     |
|                                                                                                                                        | Fairly often | 632 (17.9%)                | 163 (14.0%)               | 469 (19.8%)                 |                     |
|                                                                                                                                        | Very often   | 512 (14.5%)                | 105 (9.0%)                | 407 (17.2%)                 |                     |
| 3. In the last month, how often have you felt nervous and “stressed”                                                                   | Never        | 270 (7.6%)                 | 126 (10.9%)               | 144 (6.1%)                  |                     |
|                                                                                                                                        | Almost never | 393 (11.1%)                | 165 (14.2%)               | 228 (9.6%)                  |                     |
|                                                                                                                                        | Sometimes    | 1069 (30.3%)               | 410 (35.3%)               | 659 (27.8%)                 |                     |
|                                                                                                                                        | Fairly often | 905 (25.6%)                | 276 (23.8%)               | 629 (26.5%)                 |                     |
|                                                                                                                                        | Very often   | 893 (25.3%)                | 183 (15.8%)               | 710 (30.0%)                 |                     |
| 4. In the last month, how often have you dealt successfully with irritating life hassles                                               | Never        | 144 (4.1%)                 | 42 (3.6%)                 | 102 (4.3%)                  |                     |
|                                                                                                                                        | Almost never | 361 (10.3%)                | 119 (10.3%)               | 242 (10.3%)                 |                     |
|                                                                                                                                        | Sometimes    | 1144 (32.6%)               | 370 (32.1%)               | 774 (32.9%)                 |                     |
|                                                                                                                                        | Fairly often | 1145 (32.6%)               | 402 (34.9%)               | 743 (31.5%)                 |                     |
|                                                                                                                                        | Very often   | 715 (20.4%)                | 220 (19.1%)               | 495 (21.0%)                 |                     |
| 5. In the last month, how often have you felt that you were effectively coping with important changes that were occurring in your life | Never        | 168 (4.8%)                 | 57 (4.9%)                 | 111 (4.7%)                  |                     |
|                                                                                                                                        | Almost never | 371 (10.6%)                | 105 (9.1%)                | 266 (11.3%)                 |                     |
|                                                                                                                                        | Sometimes    | 1104 (31.4%)               | 351 (30.4%)               | 753 (31.9%)                 |                     |
|                                                                                                                                        | Fairly often | 1152 (32.8%)               | 413 (35.8%)               | 739 (31.3%)                 |                     |
|                                                                                                                                        | Very often   | 716 (20.4%)                | 227 (19.7%)               | 489 (20.7%)                 |                     |
| 6. In the last month, how often have you felt confident in your ability to handle your personal problems                               | Never        | 98 (2.8%)                  | 26 (2.3%)                 | 72 (3.1%)                   |                     |
|                                                                                                                                        | Almost never | 273 (7.8%)                 | 65 (5.7%)                 | 208 (8.8%)                  |                     |
|                                                                                                                                        | Sometimes    | 850 (24.2%)                | 232 (20.2%)               | 618 (26.2%)                 |                     |
|                                                                                                                                        | Fairly often | 1195 (34.1%)               | 413 (35.9%)               | 782 (33.1%)                 |                     |
|                                                                                                                                        | Very often   | 1092 (31.1%)               | 413 (35.9%)               | 679 (28.8%)                 |                     |
| 7. In the last month, how                                                                                                              | Never        | 319 (9.1%)                 | 77 (6.7%)                 | 242 (10.2%)                 |                     |

|                                                                                                                          |              |              |             |             |
|--------------------------------------------------------------------------------------------------------------------------|--------------|--------------|-------------|-------------|
| often have you felt that things were going your way                                                                      | Almost never | 598 (17.0%)  | 165 (14.4%) | 433 (18.3%) |
|                                                                                                                          | Sometimes    | 1322 (37.6%) | 422 (36.8%) | 900 (38.1%) |
|                                                                                                                          | Fairly often | 843 (24.0%)  | 323 (28.1%) | 520 (22.0%) |
|                                                                                                                          | Very often   | 431 (12.3%)  | 161 (14.0%) | 270 (11.4%) |
| 8. In the last month, how often have you found that you could not cope with all of the things that you had to do         | Never        | 596 (16.9%)  | 272 (23.5%) | 324 (13.7%) |
|                                                                                                                          | Almost never | 849 (24.1%)  | 331 (28.6%) | 518 (21.9%) |
|                                                                                                                          | Sometimes    | 1213 (34.5%) | 346 (29.9%) | 867 (36.7%) |
|                                                                                                                          | Fairly often | 549 (15.6%)  | 141 (12.2%) | 408 (17.3%) |
|                                                                                                                          | Very often   | 313 (8.9%)   | 68 (5.9%)   | 245 (10.4%) |
| 9. In the last month, how often have you been able to control the irritations in your life                               | Never        | 190 (5.4%)   | 47 (4.1%)   | 143 (6.1%)  |
|                                                                                                                          | Almost never | 428 (12.2%)  | 106 (9.2%)  | 322 (13.7%) |
|                                                                                                                          | Sometimes    | 1251 (35.7%) | 374 (32.5%) | 877 (37.3%) |
|                                                                                                                          | Fairly often | 1081 (30.9%) | 395 (34.3%) | 686 (29.2%) |
|                                                                                                                          | Very often   | 553 (15.8%)  | 228 (19.8%) | 325 (13.8%) |
| 10. In the last month, how often have you felt that you were on top of things                                            | Never        | 214 (6.1%)   | 49 (4.3%)   | 165 (7.0%)  |
|                                                                                                                          | Almost never | 512 (14.6%)  | 130 (11.3%) | 382 (16.2%) |
|                                                                                                                          | Sometimes    | 1148 (32.7%) | 344 (30.0%) | 804 (34.0%) |
|                                                                                                                          | Fairly often | 1058 (30.2%) | 399 (34.8%) | 659 (27.9%) |
|                                                                                                                          | Very often   | 576 (16.4%)  | 224 (19.5%) | 352 (14.9%) |
| 11. In the last month, how often have you been angered because of things that happened that were outside of your control | Never        | 348 (9.9%)   | 142 (12.3%) | 206 (8.8%)  |
|                                                                                                                          | Almost never | 627 (17.9%)  | 251 (21.7%) | 376 (16.0%) |
|                                                                                                                          | Sometimes    | 1275 (36.3%) | 404 (35.0%) | 871 (37.0%) |
|                                                                                                                          | Fairly often | 738 (21.0%)  | 243 (21.0%) | 495 (21.0%) |
|                                                                                                                          | Very often   | 521 (14.8%)  | 115 (10.0%) | 406 (17.2%) |
| 12. In the last month, how often have you found yourself thinking of things that you have to accomplish                  | Never        | 167 (4.8%)   | 49 (4.3%)   | 118 (5.1%)  |
|                                                                                                                          | Almost never | 227 (6.5%)   | 87 (7.6%)   | 140 (6.0%)  |
|                                                                                                                          | Sometimes    | 837 (24.1%)  | 268 (23.4%) | 569 (24.4%) |
|                                                                                                                          | Fairly often | 1031 (29.7%) | 378 (33.1%) | 653 (28.0%) |
|                                                                                                                          | Very often   | 1214 (34.9%) | 361 (31.6%) | 853 (36.6%) |
| 13. In the last month, how often have you been able to control the way you spend your time                               | Never        | 164 (4.7%)   | 40 (3.5%)   | 124 (5.3%)  |
|                                                                                                                          | Almost never | 416 (11.9%)  | 108 (9.4%)  | 308 (13.1%) |
|                                                                                                                          | Sometimes    | 1050 (30.1%) | 345 (30.2%) | 705 (30.1%) |
|                                                                                                                          | Fairly often | 1144 (32.8%) | 403 (35.2%) | 741 (31.6%) |
|                                                                                                                          | Very often   | 713 (20.4%)  | 248 (21.7%) | 465 (19.8%) |
| 14. In the last month, how often have you felt difficulties were piling up so high that you could not overcome them      | Never        | 695 (19.8%)  | 295 (25.5%) | 400 (17.0%) |
|                                                                                                                          | Almost never | 783 (22.3%)  | 303 (26.2%) | 480 (20.4%) |
|                                                                                                                          | Sometimes    | 1025 (29.2%) | 294 (25.4%) | 731 (31.1%) |
|                                                                                                                          | Fairly often | 529 (15.1%)  | 157 (13.6%) | 372 (15.8%) |
|                                                                                                                          | Very often   | 475 (13.5%)  | 107 (9.3%)  | 368 (15.7%) |

SD = standard deviation

**Supplemental Table 4.** Multivariable linear regression model for perceived stress scale (PSS-14) score at baseline

| <b>Patient characteristics</b>                                   | <b>Coefficient</b> | <b>95% CI</b> |       | <b>Pr &gt; ChiSq</b> |
|------------------------------------------------------------------|--------------------|---------------|-------|----------------------|
| Intercept                                                        | 40.73              | 37.70         | 43.77 | <.0001               |
| Female (versus male)                                             | 0.72               | 0.13          | 1.30  | 0.016                |
| Age                                                              |                    |               |       |                      |
| 18-34 years (versus 45-55 years)                                 | 2.14               | 0.91          | 3.37  | 0.001                |
| 35-44 years (versus 45-55 years)                                 | 0.67               | 0.06          | 1.27  | 0.030                |
| Race                                                             |                    |               |       |                      |
| Black (versus white)                                             | -0.68              | -1.43         | 0.08  | 0.080                |
| Other (versus white)                                             | -0.84              | -1.93         | 0.25  | 0.129                |
| Education                                                        |                    |               |       |                      |
| High school (versus < high school)                               | 1.57               | 0.31          | 2.84  | 0.015                |
| More than high school (versus < high school)                     | 1.61               | 0.33          | 2.89  | 0.014                |
| Not married (versus Married/living with a partner as if married) | -1.07              | -1.64         | -0.50 | 0.000                |
| History of smoking                                               |                    |               |       |                      |
| Current smoker (versus never smoked)                             | -0.27              | -0.94         | 0.39  | 0.419                |
| Past smoker (>1 mo and <1 yr) (versus never smoked)              | -0.63              | -1.96         | 0.70  | 0.352                |
| Past smoker (>1 yr) (versus never smoked)                        | -0.73              | -1.56         | 0.10  | 0.086                |
| Body mass index (BMI)                                            | -0.01              | -0.05         | 0.02  | 0.420                |
| Diabetes mellitus                                                | -0.44              | -1.01         | 0.12  | 0.124                |
| Hypertension                                                     | 0.14               | -0.43         | 0.71  | 0.637                |
| Hypercholesterolemia                                             | 0.40               | -0.35         | 1.15  | 0.298                |
| Chronic lung disease                                             | 0.24               | -0.64         | 1.11  | 0.593                |
| Chronic renal dysfunction                                        | 0.07               | -0.78         | 0.92  | 0.867                |
| Depression                                                       | 3.98               | 3.31          | 4.66  | <.0001               |
| History of cancer                                                | -1.09              | -2.46         | 0.28  | 0.118                |
| Prior acute myocardial infarction (AMI)                          | 0.71               | -0.31         | 1.73  | 0.174                |
| Prior coronary artery bypass graft (CABG)                        | -0.81              | -2.29         | 0.68  | 0.287                |
| Prior percutaneous coronary intervention (PCI)                   | -0.63              | -1.66         | 0.41  | 0.234                |
| Prior peripheral artery disease (PAD)                            | -1.42              | -3.21         | 0.36  | 0.119                |
| Prior angina pectoris                                            | 0.31               | -0.40         | 1.01  | 0.393                |
| History of congestive heart failure (CHF)                        | -0.53              | -1.88         | 0.82  | 0.439                |
| Prior stroke                                                     | 0.43               | -0.93         | 1.79  | 0.531                |
| Prior valve surgery                                              | -1.65              | -4.75         | 1.44  | 0.295                |
| SF-12 physical component summary (PCS) score                     | -0.08              | -0.11         | -0.06 | <.0001               |
| SF-12 mental component summary (MCS) score                       | -0.36              | -0.39         | -0.34 | <.0001               |
| Low social support                                               | 1.80               | 1.03          | 2.57  | <.0001               |
| Stressful life events during past year                           |                    |               |       |                      |

|                                                                                          |       |       |       |        |
|------------------------------------------------------------------------------------------|-------|-------|-------|--------|
| Marital separation/Divorce/Break-up of long-term relationship                            | 1.09  | 0.27  | 1.91  | 0.009  |
| Loss of job (fired)/Forced retirement                                                    | 0.12  | -0.58 | 0.82  | 0.738  |
| Loss of crop/Business failure                                                            | 1.19  | -0.04 | 2.41  | 0.058  |
| Violence/Victim of a crime                                                               | -0.01 | -1.17 | 1.15  | 0.985  |
| Major intra-family conflict                                                              | 1.92  | 1.33  | 2.51  | <.0001 |
| Major personal injury or illness (other than your heart problem)                         | 0.04  | -0.63 | 0.71  | 0.912  |
| Death/Major illness of a close family member                                             | 0.09  | -0.45 | 0.63  | 0.738  |
| Death of a spouse                                                                        | 0.18  | -2.37 | 2.72  | 0.892  |
| Number of children living in household                                                   |       |       |       |        |
| 1-2 (versus 0)                                                                           | 0.89  | 0.33  | 1.44  | 0.002  |
| $\geq 3$ (versus 0)                                                                      | 1.16  | 0.26  | 2.05  | 0.011  |
| Number of grandchildren living in household $\geq 1$ (versus 0)                          | 0.83  | -0.27 | 1.93  | 0.137  |
| Number of parents living in household $\geq 1$ (versus 0)                                | 0.65  | -0.33 | 1.63  | 0.193  |
| Finance at the end of the month                                                          |       |       |       |        |
| Just enough to make ends meet (versus some money left over)                              | 1.56  | 0.92  | 2.19  | <.0001 |
| Not enough to make ends meet (versus some money left over)                               | 3.25  | 2.50  | 4.00  | <.0001 |
| Number of jobs $\geq 2$ (versus 0-1)                                                     | 0.22  | -0.86 | 1.31  | 0.686  |
| Employment status                                                                        |       |       |       |        |
| Not working for pay (versus working 35-55 hours/week)                                    | -1.25 | -1.93 | -0.57 | 0.000  |
| Working part time (<35 hours/week) (versus working 35-55 hours/week)                     | -0.49 | -1.29 | 0.31  | 0.233  |
| Working full time with extended hours (>55 hours/week) (versus working 35-55 hours/week) | 0.91  | -0.12 | 1.94  | 0.084  |
| Country                                                                                  |       |       |       |        |
| Spain (versus US)                                                                        | -1.15 | -2.02 | -0.27 | 0.010  |
| Australia (versus US)                                                                    | 0.81  | -1.04 | 2.65  | 0.390  |

CI = confidence interval



**Supplemental Table 5.** Multivariable linear regression model for change in angina frequency at one-month after acute myocardial infarction

| <b>Patient characteristics</b>                                   | <b>Coefficient</b> | <b>95% CI</b> |       | <b>P-value</b> |
|------------------------------------------------------------------|--------------------|---------------|-------|----------------|
| Intercept                                                        | 77.10              | 63.93         | 90.27 | <.0001         |
| Female (versus male)                                             | -1.00              | -2.52         | 0.52  | 0.199          |
| Baseline perceived stress                                        |                    |               |       |                |
| Moderate (versus low)                                            | -1.83              | -3.47         | -0.18 | 0.029          |
| High (versus low)                                                | -1.60              | -3.57         | 0.37  | 0.112          |
| Age                                                              |                    |               |       |                |
| 18-34 years (versus 45-55 years)                                 | -3.84              | -7.32         | -0.36 | 0.031          |
| 35-44 years (versus 45-55 years)                                 | -2.38              | -3.96         | -0.79 | 0.003          |
| Race                                                             |                    |               |       |                |
| Black (versus white)                                             | -3.84              | -5.88         | -1.81 | 0.000          |
| Other (versus white)                                             | -2.49              | -5.47         | 0.49  | 0.102          |
| Education                                                        |                    |               |       |                |
| High school (versus < high school)                               | 1.07               | -2.28         | 4.43  | 0.530          |
| More than high school (versus < high school)                     | 1.37               | -1.97         | 4.70  | 0.422          |
| Not married (versus Married/living with a partner as if married) | -1.53              | -2.95         | -0.11 | 0.035          |
| History of smoking                                               |                    |               |       |                |
| Current smoker (versus never smoked)                             | -0.65              | -2.41         | 1.11  | 0.467          |
| Past smoker (>1 mo and <1 yr) (versus never smoked)              | -1.18              | -4.72         | 2.35  | 0.512          |
| Past smoker (>1 yr) (versus never smoked)                        | -0.44              | -2.70         | 1.81  | 0.701          |
| Body mass index (BMI)                                            | 0.06               | -0.03         | 0.15  | 0.175          |
| Diabetes mellitus                                                | -0.81              | -2.35         | 0.73  | 0.303          |
| Hypertension                                                     | 2.30               | 0.79          | 3.81  | 0.003          |
| Hypercholesterolemia                                             | 0.93               | -1.05         | 2.91  | 0.359          |
| Chronic lung disease                                             | -0.42              | -2.73         | 1.90  | 0.725          |
| Chronic renal dysfunction                                        | 0.30               | -2.04         | 2.64  | 0.801          |
| Depression                                                       | -4.10              | -5.82         | -2.39 | <.0001         |
| History of cancer                                                | -2.28              | -6.07         | 1.52  | 0.240          |
| Prior acute myocardial infarction (AMI)                          | -0.03              | -2.87         | 2.81  | 0.985          |
| Prior coronary artery bypass graft (CABG)                        | -2.85              | -7.02         | 1.32  | 0.180          |
| Prior percutaneous coronary intervention (PCI)                   | -0.22              | -3.06         | 2.62  | 0.879          |
| Prior peripheral artery disease (PAD)                            | 3.44               | -1.43         | 8.31  | 0.166          |
| Prior angina pectoris                                            | -1.26              | -3.18         | 0.65  | 0.196          |
| History of congestive heart failure (CHF)                        | -0.42              | -4.51         | 3.67  | 0.842          |
| Prior stroke                                                     | -0.81              | -4.34         | 2.73  | 0.654          |
| Prior valve surgery                                              | 6.10               | -2.93         | 15.13 | 0.185          |
| STEMI                                                            | 1.38               | -0.13         | 2.89  | 0.073          |
| Cardiogenic shock upon hospital admission                        | 1.36               | -7.01         | 9.74  | 0.750          |

|                                                         |       |        |       |        |
|---------------------------------------------------------|-------|--------|-------|--------|
| Peak troponin during index hospital stay                | 0.00  | -0.01  | 0.01  | 0.591  |
| Ejection fraction <40%                                  | 0.20  | -2.10  | 2.49  | 0.866  |
| GRACE risk score >99                                    | -0.52 | -3.46  | 2.42  | 0.729  |
| Hemodynamic instability                                 | 2.18  | -0.34  | 4.70  | 0.089  |
| Length of stay during index hospitalization             | -0.02 | -0.20  | 0.17  | 0.855  |
| Cardiac catheterization during index hospitalization    | -4.10 | -14.73 | 6.52  | 0.449  |
| PCI during index hospitalization                        | 1.23  | -0.69  | 3.15  | 0.211  |
| CABG during index hospitalization                       | 5.05  | 2.06   | 8.03  | 0.001  |
| Present more than 6 hours after symptom onset           | 1.03  | -0.37  | 2.44  | 0.149  |
| Percent of eligible quality of care indicators received | 0.02  | -0.03  | 0.08  | 0.420  |
| Low social support                                      | -2.38 | -4.48  | -0.28 | 0.027  |
| Country                                                 |       |        |       |        |
| Spain (versus US)                                       | 1.37  | -1.01  | 3.74  | 0.259  |
| Australia (versus US)                                   | 2.60  | -3.84  | 9.04  | 0.428  |
| Baseline angina frequency                               | -0.85 | -0.89  | -0.82 | <.0001 |

---

CI = confidence interval; GRACE = Global Registry of Acute Coronary Events; STEMI = ST-elevation myocardial infarction

**Supplemental Table 6.** Multivariable linear regression model for change in angina-related physical limitation at one-month after acute myocardial infarction

| <b>Patient characteristics</b>                                   | <b>Coefficient</b> | <b>95% CI</b> |       | <b>P-value</b> |
|------------------------------------------------------------------|--------------------|---------------|-------|----------------|
| Intercept                                                        | 68.12              | 53.50         | 82.75 | <.0001         |
| Female (versus male)                                             | -1.71              | -3.37         | -0.06 | 0.042          |
| Baseline perceived stress                                        |                    |               |       |                |
| Moderate (versus low)                                            | -1.28              | -3.08         | 0.51  | 0.162          |
| High (versus low)                                                | -2.06              | -4.20         | 0.09  | 0.060          |
| Age                                                              |                    |               |       |                |
| 18-34 years (versus 45-55 years)                                 | -2.44              | -6.23         | 1.35  | 0.208          |
| 35-44 years (versus 45-55 years)                                 | -1.65              | -3.39         | 0.09  | 0.063          |
| Race                                                             |                    |               |       |                |
| Black (versus white)                                             | -3.94              | -6.18         | -1.71 | 0.001          |
| Other (versus white)                                             | -2.41              | -5.67         | 0.86  | 0.149          |
| Education                                                        |                    |               |       |                |
| High school (versus < high school)                               | 4.24               | 0.58          | 7.90  | 0.023          |
| More than high school (versus < high school)                     | 5.61               | 1.97          | 9.25  | 0.003          |
| Not married (versus Married/living with a partner as if married) | -1.12              | -2.66         | 0.43  | 0.157          |
| History of smoking                                               |                    |               |       |                |
| Current smoker (versus never smoked)                             | -0.10              | -2.02         | 1.82  | 0.918          |
| Past smoker (>1 mo and <1 yr) (versus never smoked)              | -3.70              | -7.64         | 0.23  | 0.065          |
| Past smoker (>1 yr) (versus never smoked)                        | -0.60              | -3.06         | 1.85  | 0.631          |
| Body mass index (BMI)                                            | 0.00               | -0.10         | 0.10  | 0.953          |
| Diabetes mellitus                                                | 0.67               | -1.01         | 2.35  | 0.434          |
| Hypertension                                                     | 0.75               | -0.90         | 2.40  | 0.375          |
| Hypercholesterolemia                                             | -0.28              | -2.44         | 1.88  | 0.798          |
| Chronic lung disease                                             | 0.75               | -1.81         | 3.32  | 0.565          |
| Chronic renal dysfunction                                        | -1.76              | -4.33         | 0.81  | 0.179          |
| Depression                                                       | -2.93              | -4.82         | -1.05 | 0.002          |
| History of cancer                                                | -0.78              | -4.87         | 3.32  | 0.710          |
| Prior acute myocardial infarction (AMI)                          | 1.92               | -1.20         | 5.04  | 0.227          |
| Prior coronary artery bypass graft (CABG)                        | -4.42              | -8.99         | 0.15  | 0.058          |
| Prior percutaneous coronary intervention (PCI)                   | -3.24              | -6.36         | -0.13 | 0.041          |
| Prior peripheral artery disease (PAD)                            | 3.19               | -2.19         | 8.56  | 0.245          |
| Prior angina pectoris                                            | -2.21              | -4.28         | -0.13 | 0.037          |
| History of congestive heart failure (CHF)                        | 3.18               | -1.40         | 7.75  | 0.173          |
| Prior stroke                                                     | 0.35               | -3.58         | 4.28  | 0.862          |
| Prior valve surgery                                              | -5.37              | -15.03        | 4.30  | 0.277          |
| STEMI                                                            | 1.11               | -0.53         | 2.75  | 0.186          |
| Cardiogenic shock upon hospital admission                        | -3.75              | -12.72        | 5.22  | 0.412          |

|                                                         |       |        |       |        |
|---------------------------------------------------------|-------|--------|-------|--------|
| Peak troponin during index hospital stay                | 0.00  | -0.01  | 0.01  | 0.864  |
| Ejection Fraction <40%                                  | 1.28  | -1.24  | 3.79  | 0.320  |
| GRACE risk score >99                                    | -0.95 | -4.15  | 2.25  | 0.559  |
| Hemodynamic instability                                 | 3.04  | 0.27   | 5.80  | 0.032  |
| Length of stay during index hospitalization             | -0.11 | -0.31  | 0.09  | 0.282  |
| Cardiac catheterization during index hospitalization    | 7.23  | -4.75  | 19.20 | 0.237  |
| PCI during index hospitalization                        | 1.83  | -0.26  | 3.92  | 0.086  |
| CABG during index hospitalization                       | 3.12  | -0.08  | 6.33  | 0.056  |
| Present more than 6 hours after symptom onset           | 0.13  | -1.40  | 1.66  | 0.866  |
| Percent of eligible quality of care indicators received | 0.02  | -0.04  | 0.08  | 0.599  |
| Low social support                                      | -3.27 | -5.56  | -0.98 | 0.005  |
| Country                                                 |       |        |       |        |
| Spain (versus US)                                       | -9.71 | -12.30 | -7.13 | <.0001 |
| Australia (versus US)                                   | 0.25  | -6.77  | 7.26  | 0.945  |
| Baseline angina-related physical limitation             | -0.83 | -0.87  | -0.80 | <.0001 |

CI = confidence interval; GRACE = Global Registry of Acute Coronary Events; STEMI = ST-elevation myocardial infarction

**Supplemental Table 7.** Multivariable linear regression model for change in angina-related quality of life at one-month after acute myocardial infarction

| <b>Patient characteristics</b>                                   | <b>Coefficient</b> | <b>95% CI</b> |       | <b>P-value</b> |
|------------------------------------------------------------------|--------------------|---------------|-------|----------------|
| Intercept                                                        | 48.07              | 31.16         | 64.98 | <.0001         |
| Female (versus male)                                             | -3.63              | -5.64         | -1.62 | 0.000          |
| Baseline perceived stress                                        |                    |               |       |                |
| Moderate (versus low)                                            | -3.50              | -5.68         | -1.33 | 0.002          |
| High (versus low)                                                | -4.09              | -6.71         | -1.46 | 0.002          |
| Age                                                              |                    |               |       |                |
| 18-34 years (versus 45-55 years)                                 | -6.86              | -11.45        | -2.26 | 0.003          |
| 35-44 years (versus 45-55 years)                                 | -3.68              | -5.77         | -1.58 | 0.001          |
| Race                                                             |                    |               |       |                |
| Black (versus white)                                             | -4.31              | -7.01         | -1.62 | 0.002          |
| Other (versus white)                                             | -2.46              | -6.39         | 1.47  | 0.220          |
| Education                                                        |                    |               |       |                |
| High school (versus < high school)                               | 0.87               | -3.55         | 5.29  | 0.701          |
| More than high school (versus < high school)                     | 2.56               | -1.85         | 6.96  | 0.255          |
| Not married (versus Married/living with a partner as if married) | -3.19              | -5.06         | -1.32 | 0.001          |
| History of smoking                                               |                    |               |       |                |
| Current smoker (versus never smoked)                             | -1.63              | -3.95         | 0.69  | 0.169          |
| Past smoker (>1 mo and <1 yr) (versus never smoked)              | -4.22              | -8.88         | 0.44  | 0.076          |
| Past smoker (>1 yr) (versus never smoked)                        | -1.22              | -4.19         | 1.75  | 0.420          |
| Body mass index (BMI)                                            | 0.11               | -0.01         | 0.23  | 0.078          |
| Diabetes mellitus                                                | -0.92              | -2.95         | 1.12  | 0.376          |
| Hypertension                                                     | 1.40               | -0.60         | 3.39  | 0.171          |
| Hypercholesterolemia                                             | 1.92               | -0.68         | 4.52  | 0.148          |
| Chronic lung disease                                             | -1.22              | -4.27         | 1.83  | 0.431          |
| Chronic renal dysfunction                                        | 2.01               | -1.08         | 5.10  | 0.202          |
| Depression                                                       | -6.15              | -8.42         | -3.88 | <.0001         |
| History of cancer                                                | 1.58               | -3.43         | 6.60  | 0.536          |
| Prior acute myocardial infarction (AMI)                          | 1.57               | -2.20         | 5.34  | 0.415          |
| Prior coronary artery bypass graft (CABG)                        | -3.61              | -9.20         | 1.97  | 0.205          |
| Prior percutaneous coronary intervention (PCI)                   | -5.80              | -9.57         | -2.04 | 0.003          |
| Prior peripheral artery disease (PAD)                            | 2.74               | -3.66         | 9.14  | 0.402          |
| Prior angina pectoris                                            | -0.99              | -3.49         | 1.51  | 0.439          |
| History of congestive heart failure (CHF)                        | 0.21               | -5.22         | 5.64  | 0.940          |
| Prior stroke                                                     | -0.46              | -5.17         | 4.24  | 0.847          |
| Prior valve surgery                                              | -4.08              | -15.93        | 7.76  | 0.500          |
| STEMI                                                            | 1.05               | -0.93         | 3.04  | 0.299          |
| Cardiogenic shock upon hospital admission                        | 5.81               | -5.48         | 17.10 | 0.313          |

|                                                         |        |        |       |        |
|---------------------------------------------------------|--------|--------|-------|--------|
| Peak troponin during index hospital stay                | 0.01   | -0.01  | 0.02  | 0.474  |
| Ejection Fraction <40%                                  | -0.80  | -3.85  | 2.25  | 0.608  |
| GRACE risk score >99                                    | -0.32  | -4.19  | 3.56  | 0.873  |
| Hemodynamic instability                                 | 1.32   | -2.01  | 4.64  | 0.438  |
| Length of stay during index hospitalization             | -0.25  | -0.50  | -0.01 | 0.040  |
| Cardiac catheterization during index hospitalization    | 9.26   | -4.67  | 23.19 | 0.193  |
| PCI during index hospitalization                        | 1.31   | -1.22  | 3.83  | 0.311  |
| CABG during index hospitalization                       | 9.69   | 5.78   | 13.59 | <.0001 |
| Present more than 6 hours after symptom onset           | 0.69   | -1.16  | 2.54  | 0.464  |
| Percent of eligible quality of care indicators received | 0.02   | -0.05  | 0.09  | 0.615  |
| Low social support                                      | -4.03  | -6.81  | -1.25 | 0.004  |
| Country                                                 |        |        |       |        |
| Spain (versus US)                                       | -10.56 | -13.71 | -7.42 | <.0001 |
| Australia (versus US)                                   | 2.28   | -6.17  | 10.72 | 0.597  |
| Baseline angina-related quality of life                 | -0.75  | -0.79  | -0.71 | <.0001 |

CI = confidence interval; GRACE = Global Registry of Acute Coronary Events; STEMI = ST-elevation myocardial infarction

**Supplemental Table 8.** Multivariable linear regression model for change in 12-item short-form health survey (SF-12) physical component summary score at one-month after acute myocardial infarction

| <b>Patient characteristics</b>                                   | <b>Coefficient</b> | <b>95% CI</b> |       | <b>P-value</b> |
|------------------------------------------------------------------|--------------------|---------------|-------|----------------|
| Intercept                                                        | 25.21              | 17.63         | 32.79 | <.0001         |
| Female (versus male)                                             | -2.18              | -3.09         | -1.26 | <.0001         |
| Baseline perceived stress                                        |                    |               |       |                |
| Moderate (versus low)                                            | -0.40              | -1.39         | 0.58  | 0.420          |
| High (versus low)                                                | -0.93              | -2.11         | 0.25  | 0.123          |
| Age                                                              |                    |               |       |                |
| 18-34 years (versus 45-55 years)                                 | -0.32              | -2.45         | 1.81  | 0.768          |
| 35-44 years (versus 45-55 years)                                 | -1.00              | -1.95         | -0.05 | 0.039          |
| Race                                                             |                    |               |       |                |
| Black (versus white)                                             | -0.49              | -1.72         | 0.73  | 0.430          |
| Other (versus white)                                             | -0.57              | -2.37         | 1.24  | 0.538          |
| Education                                                        |                    |               |       |                |
| High school (versus < high school)                               | 2.11               | 0.09          | 4.13  | 0.041          |
| More than high school (versus < high school)                     | 2.24               | 0.22          | 4.26  | 0.030          |
| Not married (versus Married/living with a partner as if married) | -1.18              | -2.03         | -0.33 | 0.007          |
| History of smoking                                               |                    |               |       |                |
| Current smoker (versus never smoked)                             | 0.27               | -0.79         | 1.33  | 0.620          |
| Past smoker (>1 mo and <1 yr) (versus never smoked)              | 0.69               | -1.44         | 2.82  | 0.527          |
| Past smoker (>1 yr) (versus never smoked)                        | 0.48               | -0.88         | 1.84  | 0.492          |
| Body mass index (BMI)                                            | 0.05               | -0.01         | 0.11  | 0.083          |
| Diabetes mellitus                                                | -1.18              | -2.11         | -0.25 | 0.013          |
| Hypertension                                                     | 0.26               | -0.65         | 1.17  | 0.573          |
| Hypercholesterolemia                                             | 0.07               | -1.12         | 1.26  | 0.904          |
| Chronic lung disease                                             | -1.84              | -3.23         | -0.46 | 0.009          |
| Chronic renal dysfunction                                        | -1.23              | -2.64         | 0.19  | 0.089          |
| Depression                                                       | -1.73              | -2.77         | -0.70 | 0.001          |
| History of cancer                                                | 0.07               | -2.14         | 2.27  | 0.952          |
| Prior acute myocardial infarction (AMI)                          | -1.97              | -3.68         | -0.26 | 0.024          |
| Prior coronary artery bypass graft (CABG)                        | -1.73              | -4.17         | 0.72  | 0.167          |
| Prior percutaneous coronary intervention (PCI)                   | -0.61              | -2.30         | 1.08  | 0.480          |
| Prior peripheral artery disease (PAD)                            | -2.25              | -5.21         | 0.71  | 0.136          |
| Prior angina pectoris                                            | -0.54              | -1.69         | 0.60  | 0.351          |
| History of congestive heart failure (CHF)                        | 0.55               | -1.86         | 2.97  | 0.653          |
| Prior stroke                                                     | -0.73              | -2.87         | 1.41  | 0.504          |
| Prior valve surgery                                              | 1.79               | -3.29         | 6.87  | 0.490          |
| STEMI                                                            | -0.03              | -0.93         | 0.87  | 0.948          |

|                                                         |       |       |       |        |
|---------------------------------------------------------|-------|-------|-------|--------|
| Cardiogenic shock upon hospital admission               | -0.37 | -5.34 | 4.61  | 0.885  |
| Peak troponin during index hospital stay                | -0.01 | -0.01 | 0.00  | 0.140  |
| Ejection Fraction <40%                                  | -1.54 | -2.93 | -0.15 | 0.030  |
| GRACE risk score >99                                    | 0.02  | -1.71 | 1.76  | 0.978  |
| Hemodynamic instability                                 | -1.02 | -2.53 | 0.48  | 0.183  |
| Length of stay during index hospitalization             | -0.14 | -0.25 | -0.04 | 0.009  |
| Cardiac catheterization during index hospitalization    | -1.05 | -7.02 | 4.92  | 0.730  |
| PCI during index hospitalization                        | 0.02  | -1.12 | 1.16  | 0.974  |
| CABG during index hospitalization                       | -4.74 | -6.52 | -2.97 | <.0001 |
| Present more than 6 hours after symptom onset           | 0.08  | -0.76 | 0.92  | 0.855  |
| Percent of eligible quality of care indicators received | 0.02  | -0.02 | 0.05  | 0.331  |
| Low social support                                      | -1.33 | -2.58 | -0.09 | 0.036  |
| Country                                                 |       |       |       |        |
| Spain (versus US)                                       | 1.00  | -0.47 | 2.46  | 0.182  |
| Australia (versus US)                                   | 5.18  | 1.36  | 9.00  | 0.008  |
| Baseline SF-12 physical component summary (PCS) score   | -0.59 | -0.63 | -0.55 | <.0001 |

---

CI = confidence interval; GRACE = Global Registry of Acute Coronary Events; STEMI = ST-elevation myocardial infarction



**Supplemental Table 9.** Multivariable linear regression model for change in 12-item short-form health survey (SF-12) mental component summary score at one-month after acute myocardial infarction

| <b>Patient characteristics</b>                                   | <b>Coefficient</b> | <b>95% CI</b> |       | <b>P-value</b> |
|------------------------------------------------------------------|--------------------|---------------|-------|----------------|
| Intercept                                                        | 38.68              | 31.18         | 46.18 | <.0001         |
| Female (versus male)                                             | -2.72              | -3.61         | -1.83 | <.0001         |
| Baseline perceived stress                                        |                    |               |       |                |
| Moderate (versus low)                                            | -1.96              | -2.96         | -0.96 | 0.000          |
| High (versus low)                                                | -3.66              | -4.93         | -2.38 | <.0001         |
| Age                                                              |                    |               |       |                |
| 18-34 years (versus 45-55 years)                                 | -2.44              | -4.52         | -0.36 | 0.022          |
| 35-44 years (versus 45-55 years)                                 | -0.66              | -1.59         | 0.27  | 0.164          |
| Race                                                             |                    |               |       |                |
| Black (versus white)                                             | 1.13               | -0.07         | 2.33  | 0.064          |
| Other (versus white)                                             | 0.20               | -1.57         | 1.97  | 0.825          |
| Education                                                        |                    |               |       |                |
| High school (versus < high school)                               | 0.89               | -1.08         | 2.87  | 0.375          |
| More than high school (versus < high school)                     | 1.07               | -0.90         | 3.04  | 0.289          |
| Not married (versus Married/living with a partner as if married) | -0.83              | -1.66         | 0.00  | 0.050          |
| History of smoking                                               |                    |               |       |                |
| Current smoker (versus never smoked)                             | -0.32              | -1.35         | 0.71  | 0.544          |
| Past smoker (>1 mo and <1 yr) (versus never smoked)              | -0.42              | -2.50         | 1.65  | 0.690          |
| Past smoker (>1 yr) (versus never smoked)                        | 0.34               | -1.00         | 1.67  | 0.621          |
| Body mass index (BMI)                                            | 0.06               | 0.00          | 0.11  | 0.049          |
| Diabetes mellitus                                                | 0.46               | -0.45         | 1.36  | 0.324          |
| Hypertension                                                     | -0.01              | -0.89         | 0.88  | 0.985          |
| Hypercholesterolemia                                             | 0.53               | -0.63         | 1.69  | 0.372          |
| Chronic lung disease                                             | -1.55              | -2.89         | -0.20 | 0.025          |
| Chronic renal dysfunction                                        | 0.28               | -1.10         | 1.66  | 0.693          |
| Depression                                                       | -2.72              | -3.75         | -1.68 | <.0001         |
| History of cancer                                                | -0.05              | -2.21         | 2.10  | 0.961          |
| Prior acute myocardial infarction (AMI)                          | -0.10              | -1.78         | 1.57  | 0.903          |
| Prior coronary artery bypass graft (CABG)                        | 1.09               | -1.30         | 3.47  | 0.372          |
| Prior percutaneous coronary intervention (PCI)                   | -1.20              | -2.85         | 0.45  | 0.156          |
| Prior peripheral artery disease (PAD)                            | -1.44              | -4.33         | 1.44  | 0.327          |
| Prior angina pectoris                                            | -0.45              | -1.56         | 0.67  | 0.433          |
| History of congestive heart failure (CHF)                        | -0.15              | -2.51         | 2.21  | 0.902          |
| Prior stroke                                                     | 0.85               | -1.23         | 2.94  | 0.423          |
| Prior valve surgery                                              | -3.09              | -8.04         | 1.87  | 0.223          |
| STEMI                                                            | 0.03               | -0.85         | 0.91  | 0.946          |

|                                                         |       |       |       |        |
|---------------------------------------------------------|-------|-------|-------|--------|
| Cardiogenic shock upon hospital admission               | 1.60  | -3.26 | 6.47  | 0.518  |
| Peak troponin during index hospital stay                | 0.00  | -0.01 | 0.00  | 0.534  |
| Ejection Fraction <40%                                  | 1.18  | -0.17 | 2.53  | 0.088  |
| GRACE risk score >99                                    | -0.36 | -2.05 | 1.33  | 0.675  |
| Hemodynamic instability                                 | 1.27  | -0.20 | 2.74  | 0.091  |
| Length of stay during index hospitalization             | -0.04 | -0.15 | 0.06  | 0.422  |
| Cardiac catheterization during index hospitalization    | 4.39  | -1.44 | 10.22 | 0.140  |
| PCI during index hospitalization                        | 0.38  | -0.74 | 1.49  | 0.508  |
| CABG during index hospitalization                       | 1.87  | 0.14  | 3.60  | 0.034  |
| Present more than 6 hours after symptom onset           | -0.12 | -0.94 | 0.70  | 0.775  |
| Percent of eligible quality of care indicators received | 0.00  | -0.03 | 0.04  | 0.799  |
| Low social support                                      | -2.54 | -3.77 | -1.32 | <.0001 |
| Country                                                 |       |       |       |        |
| Spain (versus US)                                       | -0.45 | -1.88 | 0.97  | 0.533  |
| Australia (versus US)                                   | -1.73 | -5.46 | 2.01  | 0.365  |
| Baseline SF-12 mental component summary (MCS) score     | -0.82 | -0.86 | -0.77 | <.0001 |

---

CI = confidence interval; GRACE = Global Registry of Acute Coronary Events; STEMI = ST-elevation myocardial infarction

**Supplemental Table 10.** Multivariable linear regression model for change in Euro-QoI (EQ-5D) utility index score at one-month after acute myocardial infarction

| <b>Patient characteristics</b>                                   | <b>Coefficient</b> | <b>95% CI</b> |        | <b>P-value</b> |
|------------------------------------------------------------------|--------------------|---------------|--------|----------------|
| Intercept                                                        | 0.632              | 0.514         | 0.750  | <.0001         |
| Female (versus male)                                             | -0.033             | -0.047        | -0.019 | <.0001         |
| Baseline perceived stress                                        |                    |               |        |                |
| Moderate (versus low)                                            | -0.005             | -0.020        | 0.011  | 0.552          |
| High (versus low)                                                | -0.023             | -0.042        | -0.005 | 0.013          |
| Age                                                              |                    |               |        |                |
| 18-34 years (versus 45-55 years)                                 | -0.016             | -0.048        | 0.017  | 0.343          |
| 35-44 years (versus 45-55 years)                                 | -0.015             | -0.030        | -0.001 | 0.041          |
| Race                                                             |                    |               |        |                |
| Black (versus white)                                             | -0.005             | -0.024        | 0.014  | 0.582          |
| Other (versus white)                                             | -0.018             | -0.045        | 0.009  | 0.196          |
| Education                                                        |                    |               |        |                |
| High school (versus < high school)                               | 0.019              | -0.012        | 0.049  | 0.235          |
| More than high school (versus < high school)                     | 0.031              | 0.000         | 0.061  | 0.049          |
| Not married (versus Married/living with a partner as if married) | -0.013             | -0.026        | 0.000  | 0.055          |
| History of smoking                                               |                    |               |        |                |
| Current smoker (versus never smoked)                             | -0.019             | -0.035        | -0.002 | 0.025          |
| Past smoker (>1 mo and <1 yr) (versus never smoked)              | -0.024             | -0.057        | 0.008  | 0.143          |
| Past smoker (>1 yr) (versus never smoked)                        | 0.006              | -0.015        | 0.027  | 0.583          |
| Body mass index (BMI)                                            | -0.001             | -0.002        | 0.000  | 0.085          |
| Diabetes mellitus                                                | 0.002              | -0.013        | 0.016  | 0.836          |
| Hypertension                                                     | 0.002              | -0.012        | 0.016  | 0.740          |
| Hypercholesterolemia                                             | 0.002              | -0.017        | 0.020  | 0.859          |
| Chronic lung disease                                             | -0.026             | -0.048        | -0.005 | 0.016          |
| Chronic renal dysfunction                                        | -0.012             | -0.034        | 0.009  | 0.266          |
| Depression                                                       | -0.052             | -0.068        | -0.036 | <.0001         |
| History of cancer                                                | -0.014             | -0.049        | 0.021  | 0.430          |
| Prior acute myocardial infarction (AMI)                          | 0.003              | -0.023        | 0.029  | 0.837          |
| Prior coronary artery bypass graft (CABG)                        | -0.020             | -0.058        | 0.019  | 0.319          |
| Prior percutaneous coronary intervention (PCI)                   | -0.025             | -0.051        | 0.001  | 0.059          |
| Prior peripheral artery disease (PAD)                            | 0.001              | -0.044        | 0.047  | 0.961          |
| Prior angina pectoris                                            | -0.016             | -0.033        | 0.002  | 0.075          |
| History of congestive heart failure (CHF)                        | -0.016             | -0.054        | 0.022  | 0.406          |
| Prior stroke                                                     | 0.005              | -0.028        | 0.038  | 0.762          |
| Prior valve surgery                                              | -0.039             | -0.121        | 0.043  | 0.351          |
| STEMI                                                            | 0.012              | -0.002        | 0.026  | 0.081          |
| Cardiogenic shock upon hospital admission                        | 0.027              | -0.050        | 0.103  | 0.494          |

|                                                         |        |        |        |        |
|---------------------------------------------------------|--------|--------|--------|--------|
| Peak troponin during index hospital stay                | 0.000  | 0.000  | 0.000  | 0.391  |
| Ejection Fraction <40%                                  | 0.018  | -0.003 | 0.039  | 0.092  |
| GRACE risk score >99                                    | -0.002 | -0.029 | 0.025  | 0.881  |
| Hemodynamic instability                                 | -0.004 | -0.028 | 0.019  | 0.711  |
| Length of stay during index hospitalization             | -0.002 | -0.003 | 0.000  | 0.065  |
| Cardiac catheterization during index hospitalization    | 0.076  | -0.020 | 0.173  | 0.122  |
| PCI during index hospitalization                        | -0.005 | -0.023 | 0.013  | 0.586  |
| CABG during index hospitalization                       | -0.029 | -0.056 | -0.001 | 0.040  |
| Present more than 6 hours after symptom onset           | -0.004 | -0.017 | 0.009  | 0.580  |
| Percent of eligible quality of care indicators received | 0.000  | 0.000  | 0.001  | 0.107  |
| Low social support                                      | -0.047 | -0.066 | -0.027 | <.0001 |
| Country                                                 |        |        |        |        |
| Spain (versus US)                                       | -0.005 | -0.027 | 0.016  | 0.626  |
| Australia (versus US)                                   | 0.126  | 0.064  | 0.188  | <.0001 |
| Baseline EQ-5D utility index score                      | -0.772 | -0.805 | -0.740 | <.0001 |

---

CI = confidence interval; EQ-5D = Euro-Qol; GRACE = Global Registry of Acute Coronary Events; STEMI = ST-elevation myocardial infarction

**Supplemental Table 11.** Multivariable linear regression model for change in Euro-QoI (EQ-5D) visual analog scale at one-month after acute myocardial infarction

| <b>Patient characteristics</b>                                   | <b>Coefficient</b> | <b>95% CI</b> |       | <b>P-value</b> |
|------------------------------------------------------------------|--------------------|---------------|-------|----------------|
| Intercept                                                        | 54.34              | 40.55         | 68.12 | <.0001         |
| Female (versus male)                                             | -1.79              | -3.43         | -0.15 | 0.032          |
| Baseline perceived stress                                        |                    |               |       |                |
| Moderate (versus low)                                            | -2.70              | -4.48         | -0.93 | 0.003          |
| High (versus low)                                                | -5.39              | -7.54         | -3.24 | <.0001         |
| Age                                                              |                    |               |       |                |
| 18-34 years (versus 45-55 years)                                 | -0.87              | -4.63         | 2.89  | 0.649          |
| 35-44 years (versus 45-55 years)                                 | 0.39               | -1.33         | 2.10  | 0.659          |
| Race                                                             |                    |               |       |                |
| Black (versus white)                                             | -0.57              | -2.76         | 1.62  | 0.609          |
| Other (versus white)                                             | -0.27              | -3.55         | 3.01  | 0.872          |
| Education                                                        |                    |               |       |                |
| High school (versus < high school)                               | 0.21               | -3.37         | 3.79  | 0.908          |
| More than high school (versus < high school)                     | 0.99               | -2.58         | 4.56  | 0.587          |
| Not married (versus Married/living with a partner as if married) | -1.24              | -2.78         | 0.29  | 0.111          |
| History of smoking                                               |                    |               |       |                |
| Current smoker (versus never smoked)                             | -2.11              | -4.01         | -0.22 | 0.029          |
| Past smoker (>1 mo and <1 yr) (versus never smoked)              | -1.71              | -5.51         | 2.10  | 0.379          |
| Past smoker (>1 yr) (versus never smoked)                        | -0.52              | -2.94         | 1.90  | 0.675          |
| Body mass index (BMI)                                            | -0.06              | -0.16         | 0.04  | 0.212          |
| Diabetes mellitus                                                | 0.77               | -0.90         | 2.44  | 0.367          |
| Hypertension                                                     | 0.53               | -1.10         | 2.17  | 0.523          |
| Hypercholesterolemia                                             | -2.44              | -4.57         | -0.32 | 0.024          |
| Chronic lung disease                                             | -4.29              | -6.77         | -1.80 | 0.001          |
| Chronic renal dysfunction                                        | -2.56              | -5.07         | -0.05 | 0.046          |
| Depression                                                       | -2.88              | -4.72         | -1.04 | 0.002          |
| History of cancer                                                | -0.35              | -4.49         | 3.78  | 0.867          |
| Prior acute myocardial infarction (AMI)                          | -2.45              | -5.51         | 0.62  | 0.117          |
| Prior coronary artery bypass graft (CABG)                        | -2.15              | -6.66         | 2.37  | 0.351          |
| Prior percutaneous coronary intervention (PCI)                   | -1.64              | -4.69         | 1.41  | 0.291          |
| Prior peripheral artery disease (PAD)                            | -3.22              | -8.37         | 1.92  | 0.219          |
| Prior angina pectoris                                            | -0.65              | -2.68         | 1.38  | 0.531          |
| History of congestive heart failure (CHF)                        | -2.10              | -6.54         | 2.33  | 0.353          |
| Prior stroke                                                     | -2.80              | -6.61         | 1.01  | 0.150          |
| Prior valve surgery                                              | -8.21              | -17.74        | 1.31  | 0.091          |
| STEMI                                                            | 0.29               | -1.33         | 1.91  | 0.726          |
| Cardiogenic shock upon hospital admission                        | 3.43               | -5.40         | 12.25 | 0.447          |

|                                                         |       |        |       |        |
|---------------------------------------------------------|-------|--------|-------|--------|
| Peak troponin during index hospital stay                | 0.01  | -0.01  | 0.02  | 0.382  |
| Ejection Fraction <40%                                  | 0.48  | -2.02  | 2.99  | 0.705  |
| GRACE risk score >99                                    | 1.83  | -1.34  | 5.00  | 0.258  |
| Hemodynamic instability                                 | 1.21  | -1.50  | 3.91  | 0.382  |
| Length of stay during index hospitalization             | -0.20 | -0.40  | 0.00  | 0.047  |
| Cardiac catheterization during index hospitalization    | 7.37  | -3.82  | 18.57 | 0.197  |
| PCI during index hospitalization                        | -1.04 | -3.11  | 1.02  | 0.321  |
| CABG during index hospitalization                       | 1.24  | -1.94  | 4.41  | 0.445  |
| Present more than 6 hours after symptom onset           | -0.20 | -1.71  | 1.32  | 0.800  |
| Percent of eligible quality of care indicators received | 0.04  | -0.02  | 0.10  | 0.184  |
| Low social support                                      | -2.47 | -4.75  | -0.19 | 0.034  |
| Country                                                 |       |        |       |        |
| Spain (versus US)                                       | -9.93 | -12.52 | -7.34 | <.0001 |
| Australia (versus US)                                   | 7.41  | 0.62   | 14.21 | 0.033  |
| Baseline EQ-5D visual analog scale                      | -0.70 | -0.74  | -0.66 | <.0001 |

---

CI = confidence interval; EQ-5D = Euro-Qol; GRACE = Global Registry of Acute Coronary Events; STEMI = ST-elevation myocardial infarction
